# Supplementary material
Source: PubMed Central journal article supplement (PMC10302453)
Supplement: NIHMS1905730-supplement-Supplemental_Figures.pdf [file NIHMS1905730-supplement-Supplemental_Figures.pdf]

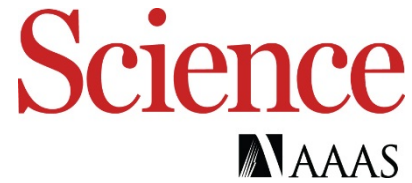

## Supplementary Materials for

### **RAD51 bypasses the CMG helicase to promote replication fork reversal**

Wenpeng Liu, Yuichiro Saito, Jessica Jackson, Masato T. Kanemaki, Alessandro Vindigni, and  
David Cortez

Correspondence to: [david.cortez@vanderbilt.edu](mailto:david.cortez@vanderbilt.edu)

#### **This PDF file includes:**

Materials and Methods  
Supplementary Text  
Figs. S1 to S8  
Tables S1 and S2

## Materials and Methods

### Cell lines

U2OS (RRID:CVCL\_0042) and HEK293T (RRID:CVCL\_0063) cells were cultured in DMEM with 7.5% fetal bovine serum (FBS). HCT116 (RRID:CVCL\_0291) cells were cultured in McCoy's 5A supplemented with 7.5% FBS. HEK293T and U2OS cells for iPOND mass spectrometry experiments were cultured in SILAC-compatible DMEM + 7.5% dialyzed FBS (Thermo Fisher Scientific, catalog no. A33822; R&D Systems, catalog no. S12850H), supplemented with either isotopically light or heavy  $^{13}\text{C}$ ,  $^{15}\text{N}$  lysine, and  $^{13}\text{C}$ ,  $^{15}\text{N}$  arginine. Cells were cultured at 37°C and 5%  $\text{CO}_2$  with humidity. All cell lines were regularly tested for mycoplasma and verified using short tandem repeat profiling. U2OS, and HEK293T cells are female. HCT116 cells are male. HCT116 MCM2-AID2, MCM3-AID2, MCM4-AID2 and GINS4-AID2 cells were generated by CRISPR-Cas9 mediated genome editing using previously described methods (15, 55). Briefly, we designed a CRISPR-Cas9 plasmid for targeting the following gene locus.

MCM2: 5'-GAGGCCCTATGCCATCCATA(AGG)-3'

MCM3: 5'-CTACCTCCACCAAAGTCGCG(TGG)-3'

MCM4: 5'-GGTGTGGTCTGCATCTCAGT(TGG)-3'

GINS4: 5'-ATGCCTAGTTTTAAATTAGC(TGG)-3'

A donor plasmid harboring mAID and a selection marker with two homology arms (about 500 bp each) was constructed. A parental HCT116 cell line stably expressing sTIR1(F74G) from the AAVS1 locus was transfected with the CRISPR and donor plasmids. Subsequently, colonies were formed in selection medium. After isolation of potential clones, the biallelic insertion of the tagging construct was checked by genomic PCR, and then the expression of the fusion protein was confirmed by immunoblotting.

### iPOND proteomics

Proteomics changes in U2OS cells, 293T cells and HCT116 cells were determined using iPOND-SILAC MS as described previously (56). Briefly, EdU labeled and indicated drug treated cells were harvested following cross-linking with 1% formaldehyde for 10 min and quenched with glycine. Cells were permeabilized in 0.25% Triton X-100/PBS for 30 min. Heavy labeled and light labeled cells were combined 1:1 prior to performing the click reaction for 2 hr. Streptavidin coupled C1 magnabeads were utilized to capture DNA-protein complexes, washed, and boiled in sample buffer to reverse the cross-links. The samples were separated by SDS-PAGE gel and digested with trypsin. MudPIT analysis was performed on the extracted peptides using an eight-step gradient. MaxQuant was utilized for peptide and protein identification.  $5 \times 10^8$  cells per sample were utilized for CMG level analysis in HEK293T cells and U2OS cells. To examine protein changes in MCM2 degran cells, cells were incubated for 10 min with 10  $\mu\text{M}$  EdU followed by 4 hours of 4 mM HU and 2  $\mu\text{M}$  5-ph-IAA leaving EdU in the media.

### Retrovirus production

pLNCX2-RAD51 vectors were transfected with p-VSVG into GP2-293 cells with Fugene HD. Fresh media was added 24 hours after transfection. Virus was collected at 48 and 72

hours after transfection and used to infect HCT116 or U2OS cells. Cells are selected with 500 $\mu$ g/ml G418 to establish stable cell lines.

#### Nascent strand degradation assays

Nascent strand degradation assays were performed using DNA fiber spreading as described previously (17). Cells were labeled with nucleoside analogs as indicated in the figures. Following stretching and fixation on glass slides, DNA was denatured in 2.5 M HCl, washed three times with phosphate-buffered saline (PBS), and blocked in 10% goat serum/PBS with 0.1% Triton X-100 for 1 hour. Slides are incubated with mouse anti-BrdU (IdU) and rat anti-BrdU (CldU) antibodies followed by Alexa-Fluor 594 anti-rat and Alexa-Fluor 488 anti-mouse secondary antibodies. Median of the IdU/CldU ratios are plotted, 100-300 fibers were measured for each sample. P values were calculated using a Kruskal-Wallis test.

#### DNA combing assays

Cells were labeled with the nucleoside analogs as described in the figures. DNA combing was then performed using a DNA combing instrument as previously described (57). The S1 nuclease digestion assay was also completed as previously described with the digestion happening in the low-melting agarose plugs (57).

#### Immunofluorescence

To measure the amount of proteins in the insoluble/chromatin fraction, cells were detergent extracted with 0.5% Triton X-100 prior to fixing with 3% paraformaldehyde/2% sucrose. Slides were blocked with 1% goat serum in PBST (0.1% triton-X100) and incubated with antibody. EdU was detected using click chemistry with an Alexa Fluor 488-conjugated azide. Immunofluorescent images were obtained and analyzed by ImageXpress microscopy and software.

#### PLA assay for MCM7 and EdU

The Sigma PLA kit protocol was used with the following additions. Cells were pre-extracted and fixed as stated in the immunofluorescence method. Then the cells were blocked with 3% BSA and processed via click chemistry with biotin-azide. MCM7 antibody (Santa Cruz SC-9966) (1:100 dilution) and biotin antibody (CST 5597) (1:200 dilution) were used in the assay.

#### Electron microscopy

Electron microscopy experiments were performed as previously described (58).  $5 \times 10^6$  cells transfected with the indicated siRNAs were collected immediately after treatment with 4 mM hydroxyurea, 20 $\mu$ M DNA2 inhibitor C5 and 25 $\mu$ M MRE11 inhibitor Mirin, with or without 2 $\mu$ M 5-ph-IAA for 4 hours. DNA was cross-linked by incubating with 10  $\mu$ g/mL 4,5',8-trimethylpsoralen followed by a 3-minute exposure to 366 nm UV light on a precooled metal block, for a total of three rounds. Cells were lysed and genomic DNA was isolated from the nuclei by proteinase K digestion and chloroform-isoamyl alcohol extraction. Genomic DNA was purified by isopropanol precipitation and digested with PvuII HF with the appropriate buffer for 4 hours at 37°C. Replication intermediates were enriched on a benzoylated naphthoylated DEAE-cellulose (Sigma-Aldrich) column. Samples were prepared for visualization by EM by spreading the purified, concentrated DNA on a carbon-coated grid in the presence of benzyl-dimethyl-alkylammonium chloride, followed by platinum rotary shadowing. Images were obtained on a JEOL JEM-1400 electron

microscope using a bottom mounted AMT XR401 camera. Analysis was performed using ImageJ software (National Institute of Health). EM analysis allows distinguishing duplex DNA—which is expected to appear as a 10 nm thick fiber after the platinum/carbon coating step necessary for EM visualization—from ssDNA, which has a reduced thickness of 5-7 nm. Criteria used for the assignment of a three-way junction, indicative of a replication fork, include the joining of three DNA fibers into a single junction, with two symmetrical daughter strands and single parental strand. Reversed replication forks consist of four DNA fibers joined at a single junction, consisting of two symmetrical daughter strands, one parental strand and the addition of a typically shorter fourth strand, representative of the reversed arm. The length of the two daughter strands corresponding to the newly replicated duplex should be equal ( $b = c$ ), whereas the length of the parental arm and the regressed arm can vary ( $a \neq b = c \neq d$ ). Conversely, canonical Holliday junction structures will be characterized by arms of equal length ( $a = b, c = d$ ). Particular attention is paid to the junction of the reversed replication fork to observe the presence of a bubble structure, indicating that the junction is opened and that it is simply not the result of the occasional crossover of two DNA molecules. These four-way junctions of reversed replication forks may also be collapsed and other indicators such as daughter strand symmetry, presence of single-stranded DNA at the junction or the entire structure itself, all are considered during analysis.

#### Cell fractionation

Cells ( $1 \times 10^6$ ) were harvested and washed with PBS, then lysed on ice for 20 min with 100  $\mu$ l H150 buffer, which contains 50 mM HEPES (pH7.4), 150 mM NaCl, 10% glycerol, 0.5% NP-40 and protease inhibitor cocktail (Roche). The lysate was centrifuged for 10 min at 5000g, and the supernatant is the soluble fraction. The pellet was washed two times with H150 lysis buffer, and the supernatant discarded. The pellet is then considered the insoluble nuclear fraction. The pellet was resuspended in PBS and 6xSDS loading buffer and boiled prior to SDS-PAGE and immunoblotting.

#### RAD51 expression vectors and mutagenesis

RAD51 was cloned to pLNCX2 retrovirus vector using NotI and SalI digests. Primers are as follows: NotI-RAD51-F: ATAAGAATGCGGCCGCATGGCAATGCAGATGCA

SalI-RAD51-R: AGGCCTGTCGACTCAGTCTTTGGCATCTCCCACTC

RAD51 point mutation primers are as follows:

I287T

F: AACCTACAGGAGGAAATATCATCGCCC

R: TCCTGTAGGTTTTTTGGGATCAGCAGC

Y232A

F: CAGACGCCTCGGGTCGAGGTGAGCT

R: CGAGGCGTCTGTTCTGTAAAGGGCGGT

G151D

F: CGGGACGGAGGTGAAGGAAAG

R: TCCGtcCCGGTCAATGGGAA

K133R

TGGGCGTACCCAGATCTGTCATACGCT

TGGGTACGCCAGTTCGGAATTCTCCAAA

II3A (Consists of three point mutations)

R130AF TTCGCAACTGGGAAGACCCAGATCT  
R130AR CAGTTGCGAATTCTCCAAACATTTCTGTGAT  
R303AF ATCTGGCGAAAGGAAGAGGGGAAACCAGA  
R303AR TTTCGCCAGATAACAATCTGGTTGTTGATGCATG  
K313AF TCTGCGCAATCTACGACTCTCCCTGTCTT  
K313AR AGATTGCGCAGATTCTGGTTTCCCCTCTTC  
A293T  
F: TCACACATGCATCAACAACCAGATTGTATCTG  
R: ATGTGTGATGATATTTCTCCAATAGGTTTTTTGGGA

T131P geneblock is synthesized from Genewiz, then inserted to the pLNCX2 vector.  
All mutations are sequenced before use.

The miSIFTs geneblocks were synthesized by Genewiz and inserted into the pLNCX2-RAD51 vectors using Sall and StuI digests. Sequences of the miSIFTs are as follows:

1xperfect:

GACTGAGTCGACCTAGCCTACCTGCACTGTAAGCACTTTGAAGGCCTTAATGG

2xperfect:

GACTGAGTCGACCTAGCCTACCTGCACTGTAAGCACTTTGTATCTACCTGCACT  
GTAAGCACTTTGAAGGCCTTAATGG

8A:

GACTGAGTCGACCTAGCCTACCTGAACTGTAAGCACTTTGAAGGCCTTAATGG

18G:

GACTGAGTCGACCTAGCCTACCTGCACTGTAAGCGCTTTGAAGGCCTTAATGG

9G: GACTGAGTCGACCTAGCCTACCTGCGCTGTAAGCACTTTGAAGGCCTTAATGG

22G:

GACTGAGTCGACCTAGCCTACCTGCACTGTAAGCACTTGGAAGGCCTTAATGG

6C-16C:

GACTGAGTCGACCTAGCCTACCCGCACTGTAACCACTTTGAAGGCCTTAATGG

3C: GACTGAGTCGACCTAGCCTCCCTGCACTGTAAGCACTTTGAAGGCCTTAATGG

12C:

GACTGAGTCGACCTAGCCTACCTGCACTCTAAGCACTTTGAAGGCCTTAATGG

17A-18G:

GACTGAGTCGACCTAGCCTACCTGCACTGTAAGAGCTTTGAAGGCCTTAATGG

### RNA interference

All siRNA transfections were performed using DharmaFECT reagents according to the manufacturer's instructions. Experiments were completed 3 days after transfection. See table S2 for siRNA sequences. Qiagen AllStars Negative Control Nontargeting (NT) siRNA was used in samples where a gene-selective siRNA is not indicated or to bring the total amount of siRNA to equal molar concentrations when comparing samples with one versus two siRNAs.

### Quantification and statistical analysis

Statistical analyses were completed using Prism. A Kruskal-Wallis test was used for experiments with more than two samples, and P values were calculated by Prism for the multiple comparisons. A two-tailed t test was used to compare two samples with normally distributed data. No statistical methods or criteria were used to estimate sample size or to

include/exclude samples. Statistical details of individual experiments can be found in the figure legends and in Results. Experiments shown are representative of at least two biological replicates unless otherwise indicated in the figure legend.

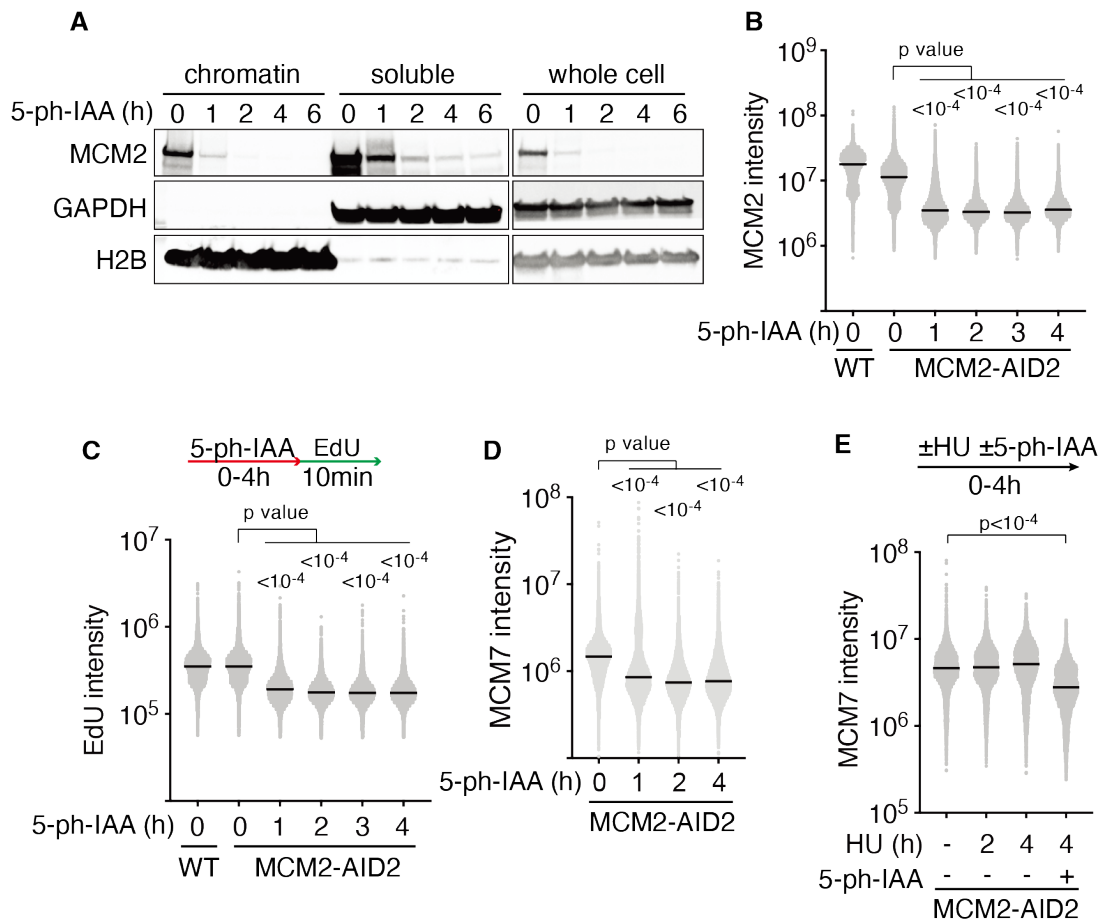

**Fig. S1. Characterization of MCM2-AID2 degron cells.**

(A) Immunoblot of MCM2-AID2 cells following 5-ph-IAA treatment and biochemical fractionation. Immunostaining of (B) insoluble MCM2, (C) EdU, (D and E) insoluble MCM7 in MCM2-AID2 cells treated as indicated. Graphs are representative of at least three experiments. P values were calculated using a Kruskal-Wallis test.

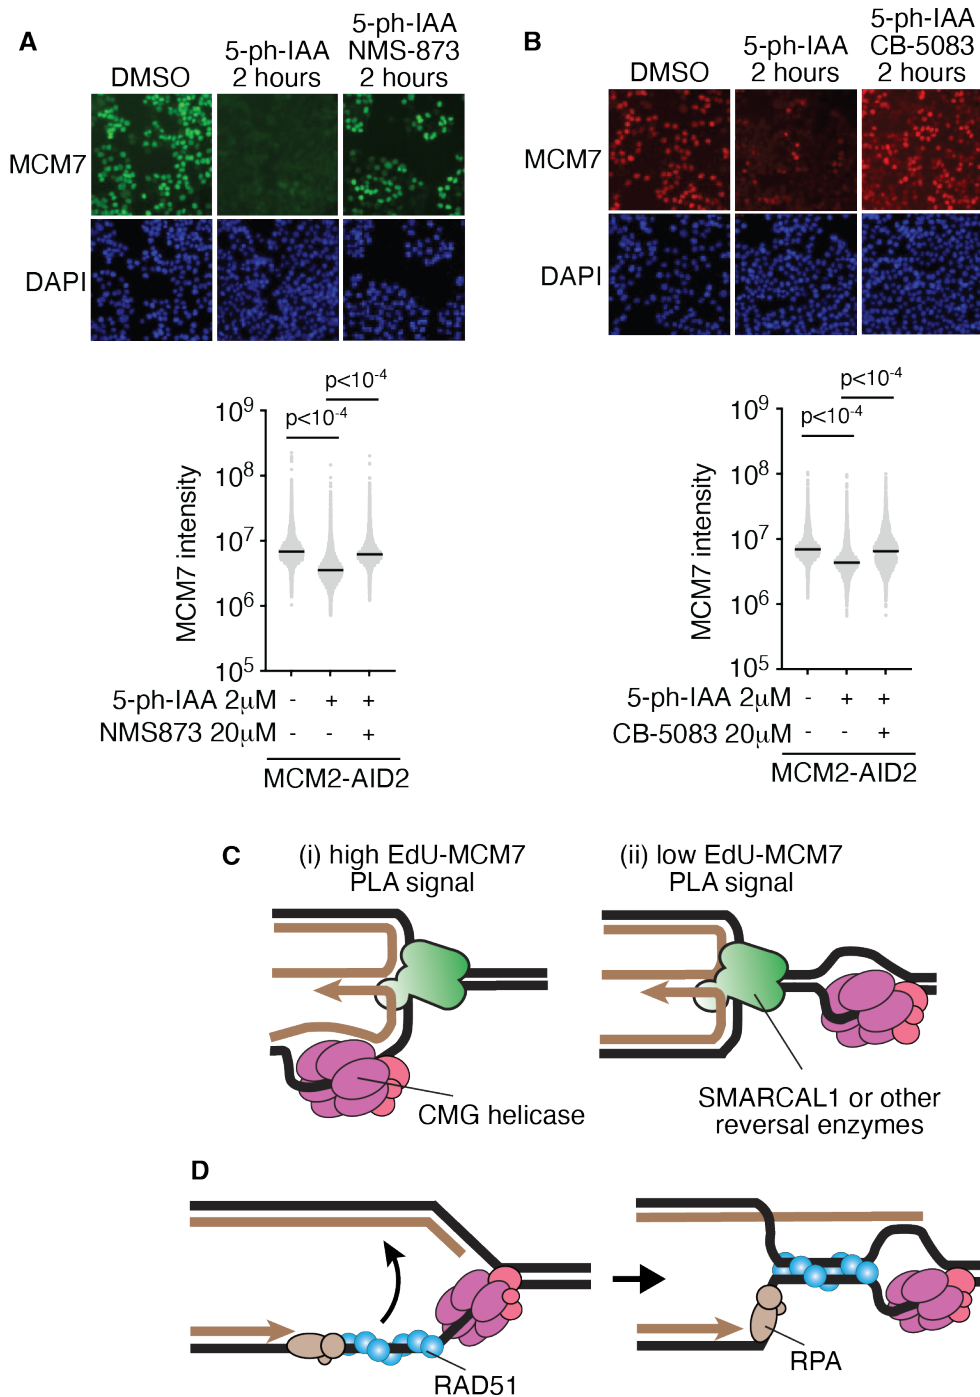

**Fig. S2. Analysis of CMG localization.**

**(A-B)** MCM2-AID2 cells were treated with 5-ph-IAA, and p97 inhibitor NMS-873 in **A**) and CB-5083 in **B**) for 2 hours to show that p97 inhibition blocks CMG disassembly. MCM7 was imaged by immunostaining in detergent pre-extracted cells. Representative images and quantitation from a representative experiment are presented. P values were calculated using a Kruskal-Wallis test. **(C)** Predictions of PLA assay between nascent DNA labeled with EdU and MCM7 depending on the position of the MCM complex during reversal. **(D)** Model for how



RAD51 strand exchange activity could generate a paranemic joint behind the CMG complex that could be a substrate for fork reversal enzymes.

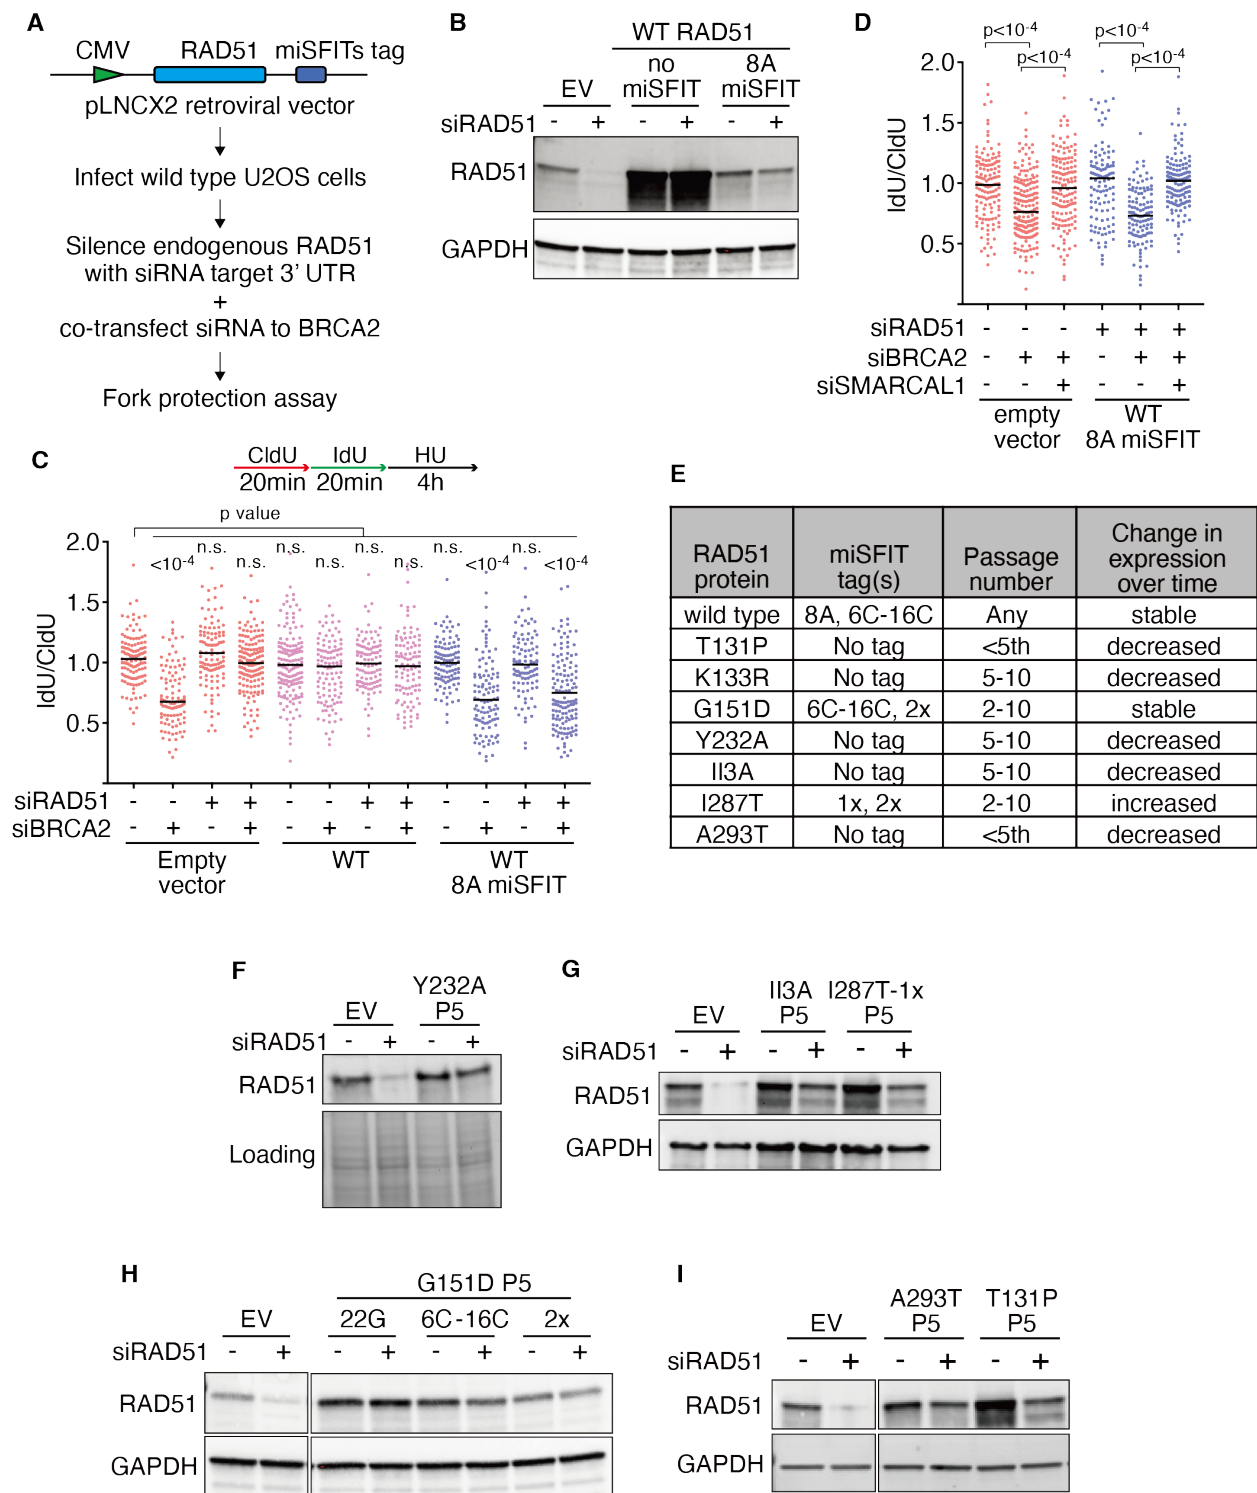

**Fig. S3. Establishment of RAD51 wild-type and mutant cell lines expressing near endogenous levels of RAD51 proteins.**

(A) Strategy for creating and analyzing RAD51 wild-type and mutant expressing cell lines. (B) Immunoblot of U2OS cells containing the indicated wild-type RAD51 expression vector. (C-D) Fork protection assay for the indicated cell lines after transfection with siRNAs. All samples

were treated with HU. Graphs are representative of at least three experiments. P values were calculated using a Kruskal-Wallis test. **(E)** Summary table of the miSFIT vectors and passage numbers used to analyze each RAD51 mutant. **(F-I)** Immunoblots of the indicated cell lines. Passage numbers are indicated. The miSFIT microRNA tag inserted into the expression vectors are indicated. (WT, wild type; EV, empty vector)

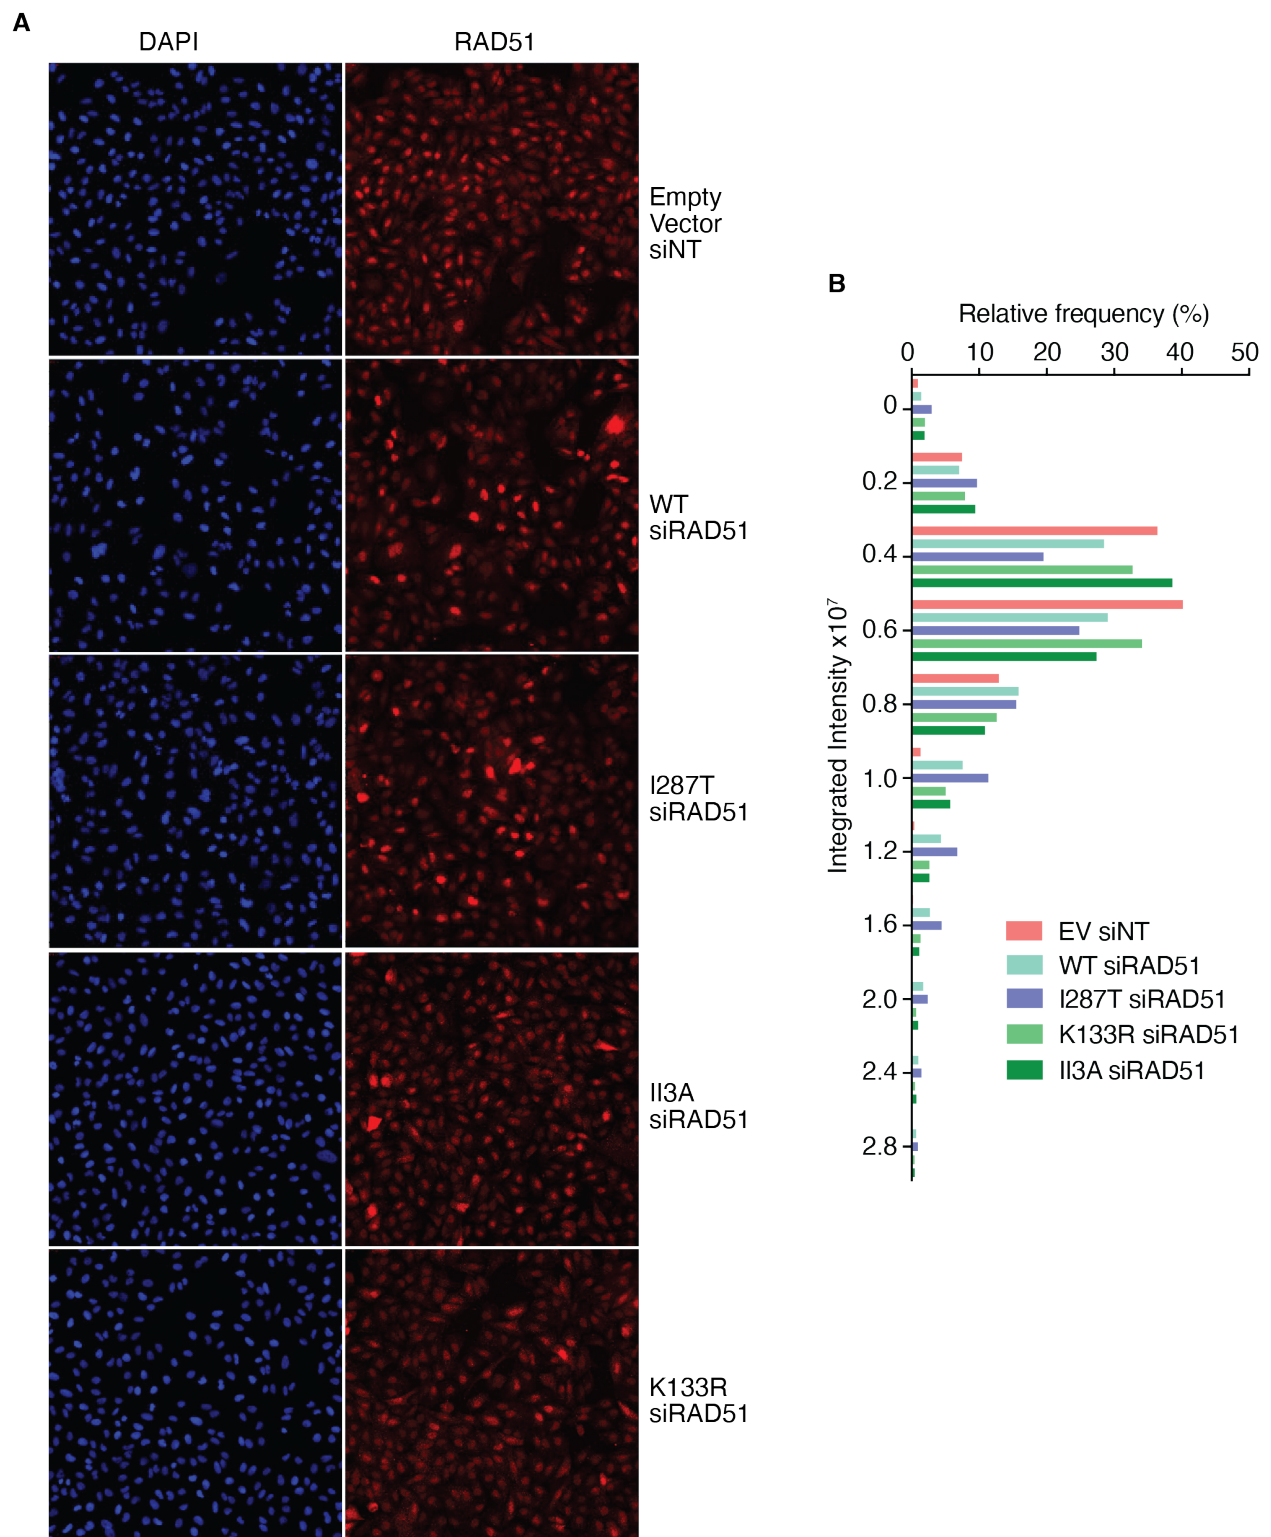

**Fig. S4. Analysis of RAD51 expression heterogeneity in stable U2OS cell lines.** (A) Immunofluorescence imaging of RAD51 in the indicated cells. EV: empty vector, siNT: non-targeting siRNA. siRAD51, siRNA targeting endogenous RAD51. (B) Distribution of RAD51 expression level in the indicated cells after transfection with siRNA to deplete endogenous RAD51.

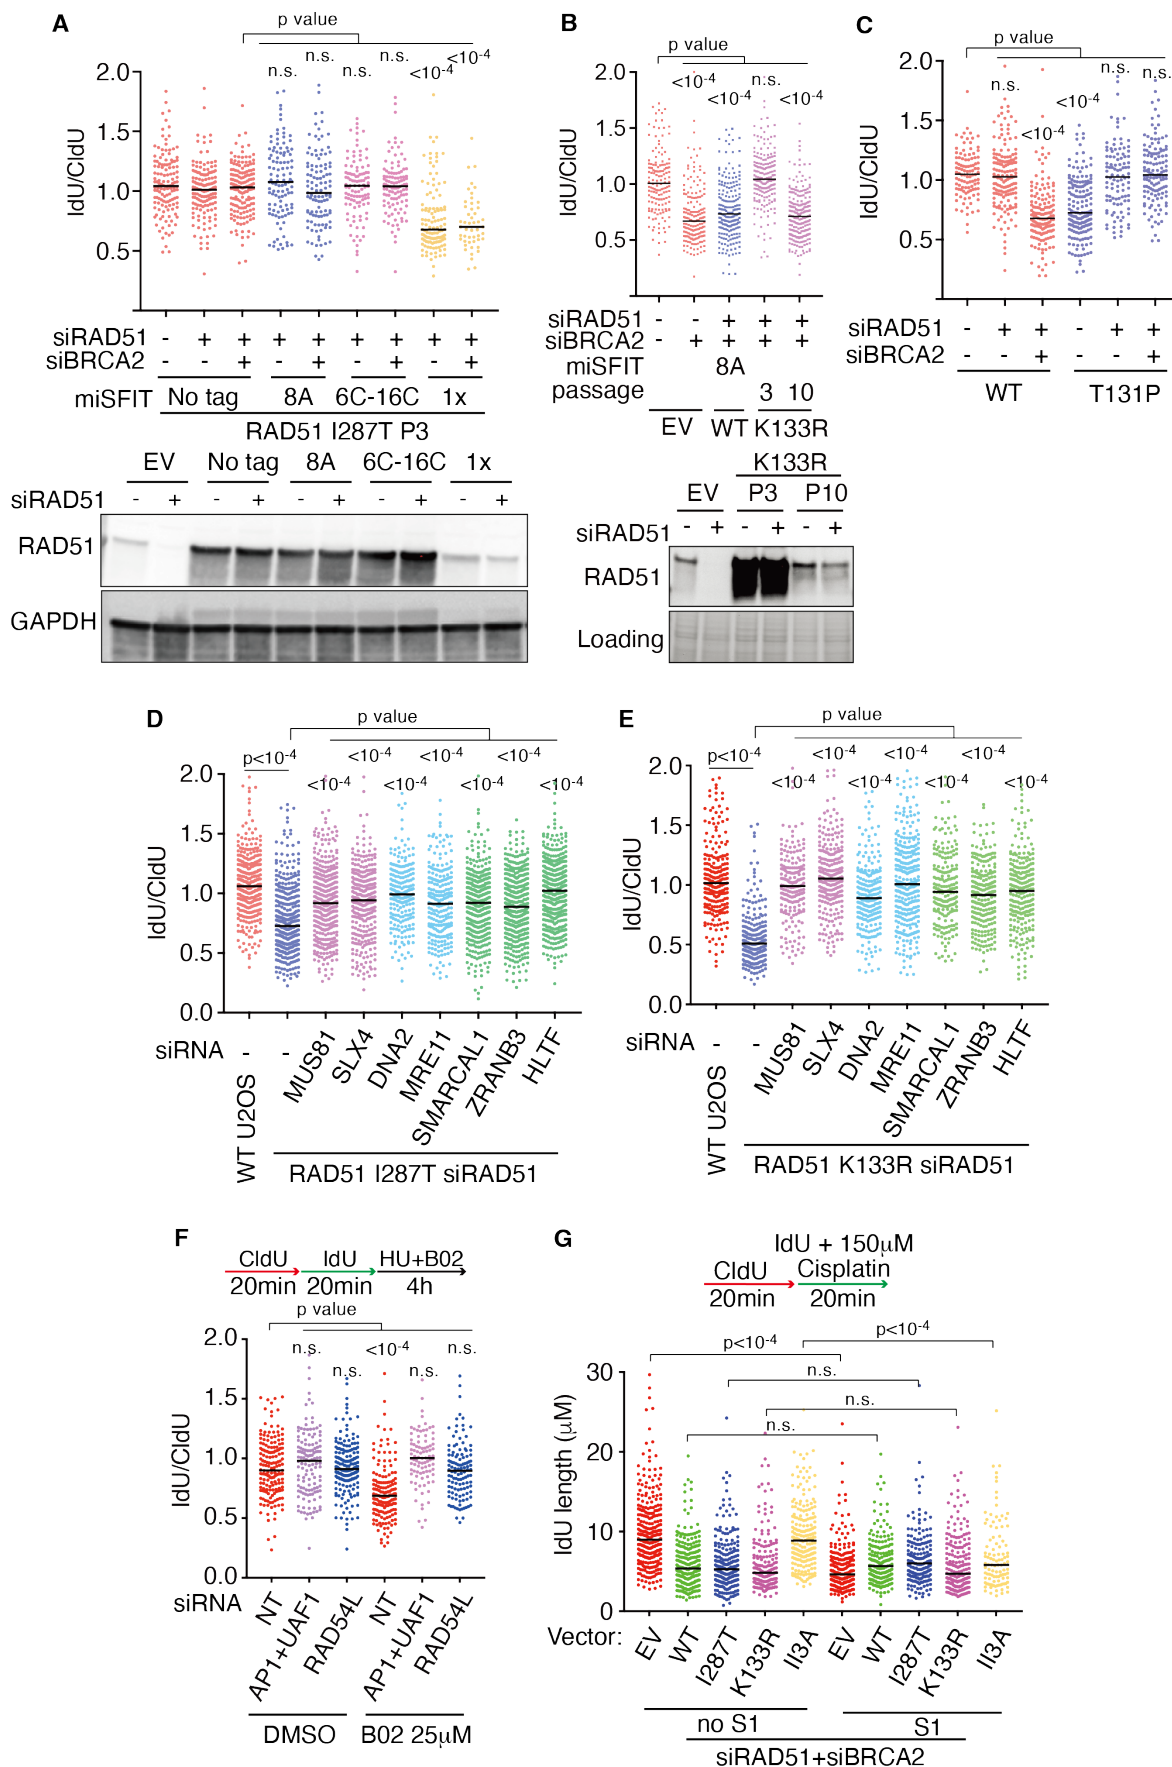

**Fig. S5. RAD51 recombinase activity is needed to generate reversed fork substrates for nascent strand degradation.**

**(A-E)** Fork protection assays were completed in the indicated cell lines. All graphs are representative of at least three experiments. Immunoblots show the expression level of RAD51 proteins. (EV, empty vector; NT, non-targeting) **(F)** Fork protection assays were completed in the indicated cell lines as in Figure 2A after treatment with B02 or DMSO as a control. All graphs are representative of at least three experiments. P values were calculated using a Kruskal-Wallis test. **(G)** Replication elongation rates in the presence of cisplatin were measured in U2OS cells expressing the indicated RAD51 proteins after transfection with siRNAs. S1 nuclease was used where indicated to determine if ssDNA gaps were present in the IdU replication tracks. P values were calculated using a Kruskal-Wallis test.

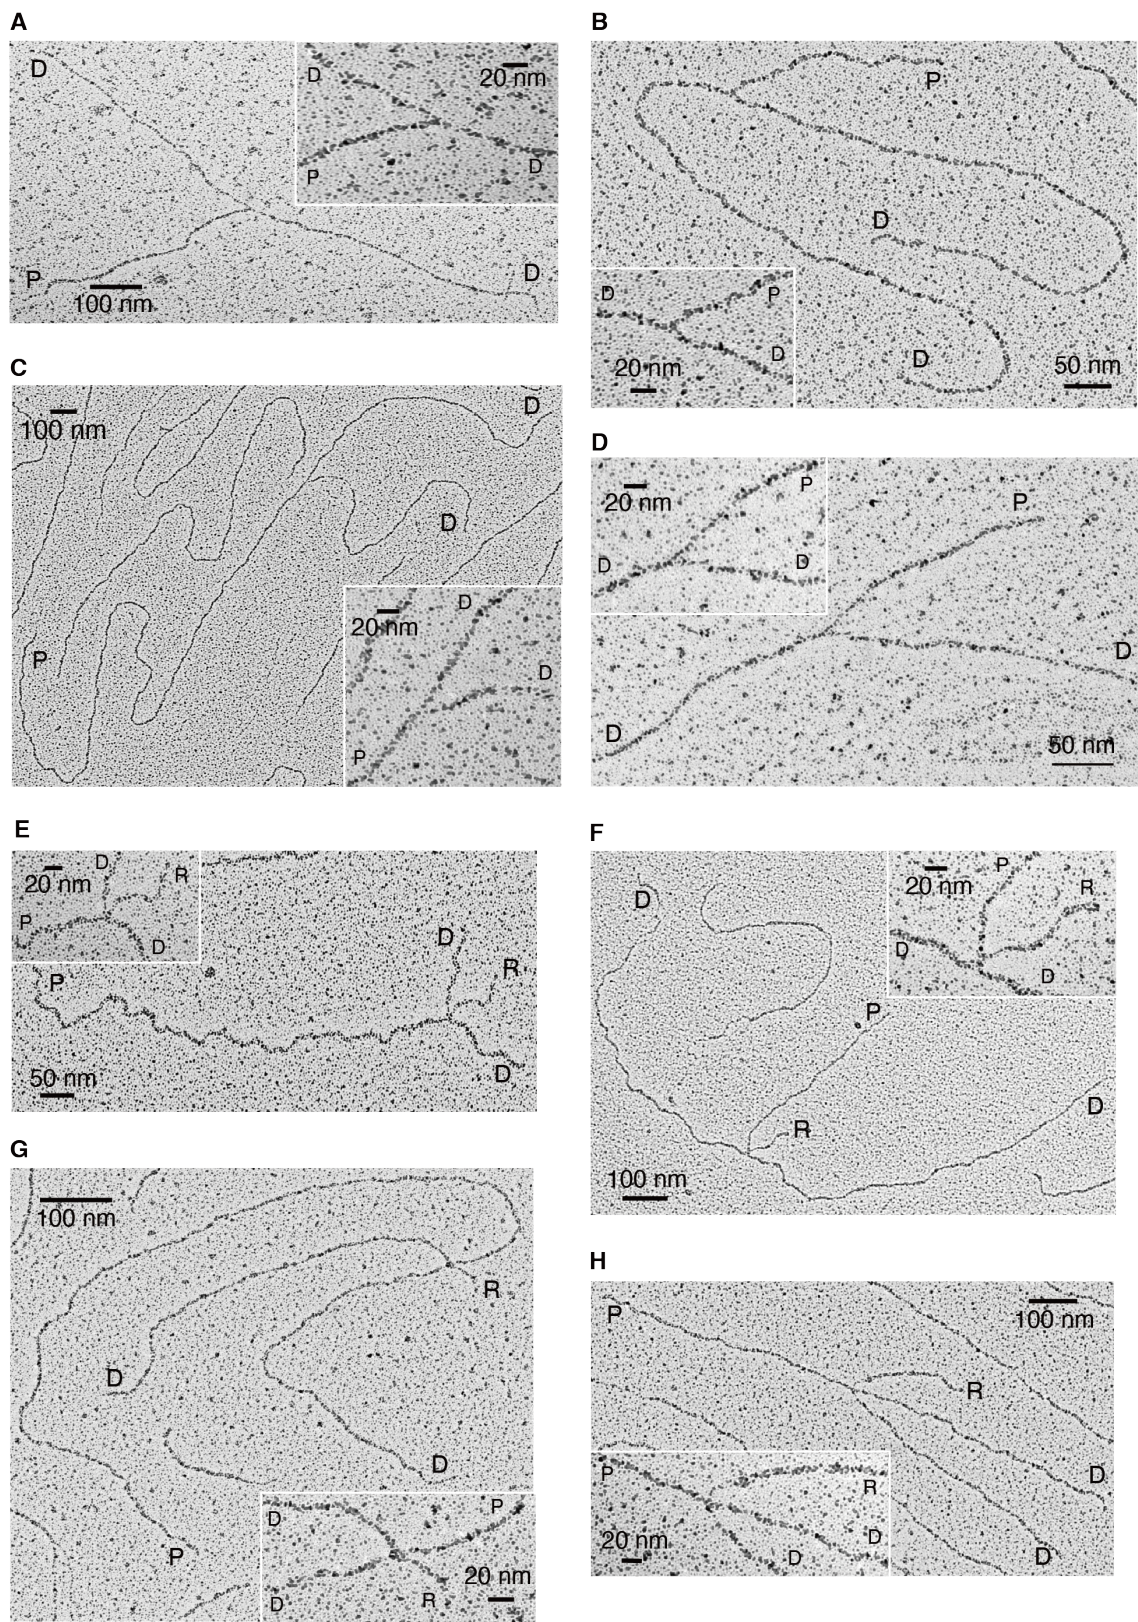

**Fig. S6. Representative electron microscopy images.**

Representative electron microscopy images of (A-D) three- and (E-H) four-way junction replication fork structures. P: parental strand, D: daughter strand and R: reversed arm

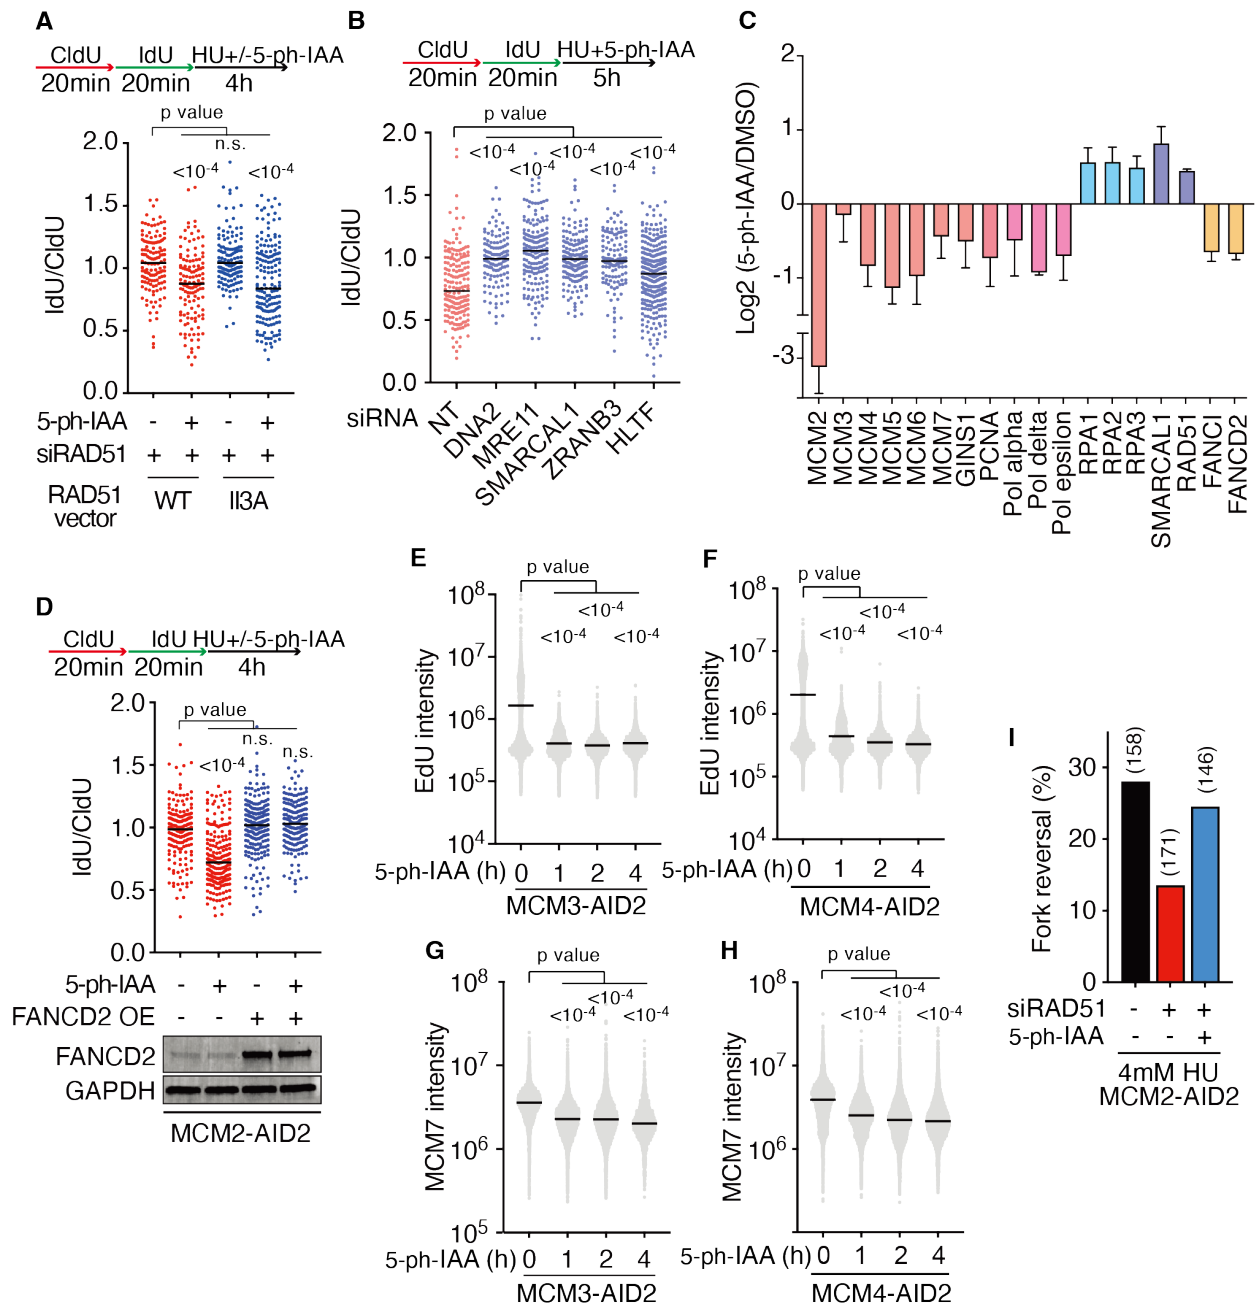

**Fig. S7. RAD51 is dispensable for fork reversal when MCM proteins are removed from the stalled fork.**

(A) Fork protection assay of MCM2-AID2 cells expressing wild type or II3A RAD51. Cells were transfected with siRNA to deplete endogenous RAD51 and treated with 2  $\mu$ M 5-ph-IAA to degrade the MCM complex. The graph is representative of two experiments. P values were calculated using a Kruskal-Wallis test. (B) Fork protection assays in MCM2-AID2 cells transfected with indicated siRNAs. 2  $\mu$ M 5-ph-IAA and 4mM HU were included in all samples. The graph is representative of at least three experiments. P values were calculated using a Kruskal-Wallis test. (C) iPOND-SILAC-MS was used to quantify the relative amounts of the indicated proteins bound to nascent DNA in the HU-treated MCM2-AID2 cells treated with 5-ph-IAA or DMSO vehicle control. (D) Fork protection assay in MCM2-AID2 cells



overexpressing (OE) FANCD2. The graph is representative of at least three experiments. P values were calculated using a Kruskal-Wallis test. The intensity of **(E and F)** EdU or **(G and H)** MCM7 was measured by immunofluorescence imaging in MCM3-AID2 or MCM4-AID2 cell lines. Cells were incubated with EdU for 20 minutes prior to staining. **(I)** Percentage of reversed replication forks in MCM2-AID2 cells transfected with the indicated siRNA and treated 72 hours later with DMSO or 5-ph-IAA together with HU, mirin, and C5 for 5 hours. The number of replication intermediates analyzed for each condition is indicated in parentheses.

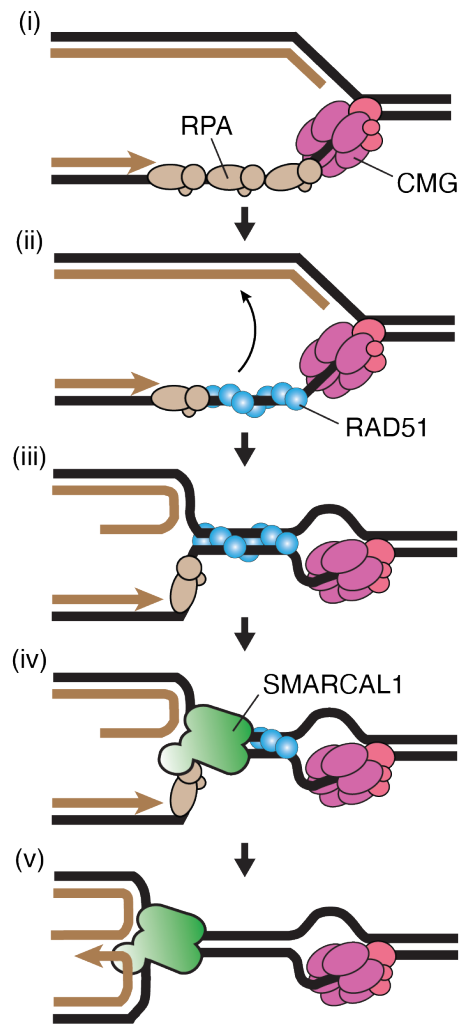

**Fig. S8. Fork reversal model.**

(i) Replication stress that causes fork reversal often involves uncoupling of helicase and polymerase activities to generate ssDNA that is bound by RPA at stalled forks. (ii) RAD51 accumulates at stalled forks and utilizes its strand exchange activity to promote invasion of the parental ssDNA into the sister chromatid duplex DNA. (iii) Strand invasion generates a paranemic joint that could be converted to a pleconemic joint by topoisomerases or other strand nicking enzymes. (iv) DNA translocases like SMARCAL1 binds the new fork junction and (v) catalyze branch migration to generate a reversed replication fork.

**Table S1. RAD51 protein characteristics**

| Function                          | RAD51 Proteins |              |              |                                           |                                                    |           |                    |                           |
|-----------------------------------|----------------|--------------|--------------|-------------------------------------------|----------------------------------------------------|-----------|--------------------|---------------------------|
|                                   | WT             | K133R        | I287T        | G151D                                     | T131P                                              | A293T     | I13A               | Y232A                     |
| ssDNA binding                     | Yes            | increased    | increased    | Yes                                       | decreased                                          | decreased | slightly decreased | decreased                 |
| dsDNA binding                     | Yes            | increased    | increased    | Yes                                       | decreased                                          | decreased | slightly decreased | decreased                 |
| Filament formation                | Yes            | hyper stable | Yes          | hyper stable                              | unstable                                           | unstable  | Yes                | ND                        |
| ATPase activity                   | Yes            | No           | increased    | decreased with DNA, increased without DNA | independent of DNA                                 | decreased | ND                 | No DNA-dependent activity |
| BRCA2 binding BRC                 | Yes            | ND           | Yes          | Yes                                       | ND                                                 | ND        | ND                 | ND                        |
| BRCA2 binding Exon27              | Yes            | ND           | Yes          | Yes                                       | ND                                                 | ND        | ND                 | ND                        |
| D-loop formation                  | Yes            | Yes          | ND           | ND                                        | No                                                 | No        | No                 | ND                        |
| Strand exchange                   | Yes            | Yes          | Increased*   | increased                                 | No                                                 | ND        | No                 | No                        |
| Homologous recombination in cells | Yes            | decreased    | decreased    | increased                                 | Yes, in presence of wild-type RAD51, ND on its own | ND        | No                 | ND                        |
| References                        |                | (33-35)      | (31, 59, 60) | (36, 37)                                  | (16, 18, 38, 40)                                   | (40, 41)  | (42, 44) (43)      | (39, 61)                  |

ND, not determined; \*increased strand invasion, but products may not resolve properly

**Table S2. Antibodies, chemicals, and siRNAs utilized.**

| Reagent                         | Source                   | Catalog number/RRID |
|---------------------------------|--------------------------|---------------------|
| Antibodies                      |                          |                     |
| Mouse monoclonal anti-GAPDH     | Millipore                | MAB374/AB_2107445   |
| Mouse monoclonal anti-BrdU      | BD Biosciences           | 347580/AB_10015219  |
| Rat monoclonal anti-BrdU        | Abcam                    | ab6326/AB_305426    |
| Goat anti-rat Alexa Fluor 594   | Thermo Fisher            | A-11007/AB_10561522 |
| Goat anti-mouse Alexa Fluor 488 | Thermo Fisher            | A-11029/AB_2534088  |
| Mouse monoclonal anti-MCM7      | Santa Cruz               | SC-9966/AB_627235   |
| Rabbit polyclonal anti-MCM3     | Bethyl                   | A300-192A/AB_162726 |
| Mouse monoclonal anti-mAID      | MBL                      | M214-3/AB_2890014   |
| Rabbit monoclonal anti-GINS4    | Abcam                    | Ab139683/           |
| Rabbit monoclonal anti-MCM2     | CST                      | 3619S/AB_2142137    |
| Rabbit polyclonal anti-H2B      | Abcam                    | Ab1790/AB_302612    |
| Mouse monoclonal anti-RAD51     | Abcam                    | ab213/AB_302856     |
| Rabbit monoclonal anti-Biotin   | CST                      | 5597S/AB_10828011   |
| Plasmid vectors                 |                          |                     |
| pCMV-FANCD2                     | Campbell Lab             |                     |
| pLNCX2                          | Clontech                 | 631503              |
| Chemicals                       |                          |                     |
| Hydroxyurea                     | Millipore Sigma          | H8627               |
| CldU                            | Millipore Sigma          | C6891               |
| IdU                             | Millipore Sigma          | I7125               |
| CB-5083                         | Selleck Chemicals        | S8101               |
| NMS-873                         | ApexBio                  | B2168               |
| MLN-4924                        | Sigma-Aldrich            | 5054770001          |
| B02 inhibitor                   | Calbiochem               | 1290541-46-6        |
| S1 nuclease kit                 | ThermoFisher             | EN0321              |
| 5-ph-IAA                        | MCE                      | HY-134653           |
| Mirin                           | Millipore Sigma          | M9948               |
| C5                              | MCE                      | HY-128729           |
| Cisplatin                       | Millipore Sigma          | P4394-250MG         |
| Camptothecin                    | Sigma-Aldrich            | 7689-03-4           |
| siRNAs                          |                          |                     |
| siRNA                           | Sequence/Source          | Catalog Number      |
| SMARCA1#6                       | GCUUUGACCUUCUUAGCAA      | J-013058-06-0002    |
| ZRANB3#2                        | GAUUCGAUCUAAUACAGU       | s38488              |
| SLX4#2                          | GAAGUGGAAUUGUCUAGCA      | s39054              |
| MRE11#3                         | GCUAAUGACUCUGAUGAUA      | D-009271-03-0010    |
| DNA2#3                          | ACAGUUGCCUGCAUUCUAA      | Custom              |
| RAD51                           | AAGUGCUGCAGCCUAAUGAGAGUG | Custom              |
| BRCA2 pool                      | Qiagen                   | S102653595          |
| HLTF pool                       | Dharmacon SMARTpool      | L-006448-00-0005    |
| MUS81 pool                      | Dharmacon SMARTpool      | L-016143-01-0005    |
| RAD54L                          | Dharmacon SMARTpool      | L-004592-00-0005    |
| RAD51AP1                        | Dharmacon SMARTpool      | L-017166-00-0005    |
| UAF1                            | Dharmacon SMARTpool      | L-016462-01-0005    |
| PRIMPOL                         | Dharmacon SMARTpool      | L-016804-02-0005    |
